# Supplementary material for: Global mycorrhizal plant distribution linked to terrestrial carbon stocks
Source: PubMed Central journal article supplement (PMC6838125; doi:10.1038/s41467-019-13019-2), 2019-11-07
Supplement: 41467_2019_13019_MOESM3_ESM.pdf [file 41467_2019_13019_MOESM3_ESM.pdf]

## **Description of Additional Supplementary Files**

File Name: Supplementary Data 1

Description: List of Bailey ecoregions used to assemble maps of mycorrhizal plants distribution.

File Name: Supplementary Data 2

Description: List of land cover categories within the ESA CCI Land Cover dataset, used to assemble maps of mycorrhizal plants distribution.

File Name: Supplementary Data 3

Description: Literature sources used in assessment of plant community composition across combinations of ecoregions, continents and landcover types.

File Name: Supplementary Data 4

Description: Literature sources used in assessment of mycorrhizal association type of plant species.

File Name: Supplementary Data 5

Description: Mycorrhizal plant cover data used for mapping of current time continental mycorrhizal vegetation.

File Name: Supplementary Data 6

Description: Mycorrhizal plant cover data used for mapping of current time mycorrhizal vegetation on islands

File Name: Supplementary Data 7

Description: Mycorrhizal plant cover data used for mapping of continental mycorrhizal vegetation in a cropland-free world.

File Name: Supplementary Data 8

Description: Mycorrhizal plant cover data used for mapping of island mycorrhizal vegetation in a cropland-free world
